# Supplementary material
Source: PubMed Central journal article supplement (PMC7790214)
Supplement: ASN.2020050566SupplementaryData1.pdf [file ASN.2020050566SupplementaryData1.pdf]

## Supplemental Table of Contents:

Table S1: Causes of death categorisation

Table S2: Missing baseline data

Table S3: Adjusted hazard ratio (using 2015-2018 as the reference year) for all-cause death.

Table S4: Adjusted hazard ratio (using 2015-2018 as the reference year) for cardiovascular death

Table S5: Adjusted hazard ratio (using 2015-2018 as the reference year) for cancer death

Table S6: Adjusted hazard ratio (using 2015-2018 as the reference year) for infection-related death

Table S7: Death after graft failure, adjusted death rates by time (<1 year or 1+years) post graft failure

Table S8. Causes of "other" deaths after first graft failure.

Figure S1: Sensitivity analysis for death after transplantation. Adjusted all-cause death rate by time periods post-transplant (per 100 patient-years), censored at retransplant and date of last follow-up.

Figure S2: Sensitivity analysis for death after transplantation. Adjusted cause-specific death rates by time periods post-transplant (per 100 patient-years), censored at retransplant and date of last follow-up.

Table S1: Causes of death categorisation

| Causes of death - ANZDATA                            | Death category |
|------------------------------------------------------|----------------|
| Myocardial ischaemia (presumed)                      | Cardiovascular |
| Myocardial ischaemia and infarction                  | Cardiovascular |
| Pulmonary oedema                                     | Cardiovascular |
| Hyperkalaemia                                        | Cardiovascular |
| Haemorrhagic pericarditis                            | Cardiovascular |
| Hypertensive cardiac failure                         | Cardiovascular |
| Cardiac arrest-cause uncertain                       | Cardiovascular |
| Other causes cardiac failure                         | Cardiovascular |
| Pulmonary embolus                                    | Cardiovascular |
| Cerebrovascular accident                             | Cardiovascular |
| Aortic aneurysm-rupture                              | Cardiovascular |
| Bowel infarction                                     | Cardiovascular |
| Withdrawal - cardiovascular comorbid conditions      | Cardiovascular |
| Withdrawal - cerebrovascular comorbid conditions     | Cardiovascular |
| Withdrawal - peripheral vascular comorbid conditions | Cardiovascular |
| Malignant disease Withdrawal - malignancy            | Cancer         |
| Withdrawal - malignancy                              | Cancer         |
| Immunodeficiency due to viral infection              | Infection      |
| Sclerosing peritonitis                               | Infection      |
| Central nervous system infection - bacterial         | Infection      |
| Central nervous system infection - viral             | Infection      |
| Central nervous system infection - fungal            | Infection      |
| Central nervous system infection - protozoa          | Infection      |
| Central nervous system infection - other             | Infection      |
| Lung infection - bacterial                           | Infection      |
| Lung infection - viral                               | Infection      |
| Lung infection - fungal                              | Infection      |
| Lung infection - protozoa                            | Infection      |
| Lung infection - other                               | Infection      |
| Urinary tract infection - bacterial                  | Infection      |
| Urinary tract infection - fungal                     | Infection      |
| Urinary tract infection - other                      | Infection      |
| Wound infection - bacterial                          | Infection      |
| Wound infection - fungal                             | Infection      |
| Wound infection - other                              | Infection      |
| Shunt infection - bacterial                          | Infection      |
| Shunt infection - fungal                             | Infection      |
| Peritonitis - bacterial                              | Infection      |
| Peritonitis - fungal                                 | Infection      |
| Peritonitis - other                                  | Infection      |
| Septicaemia - bacterial                              | Infection      |
| Septicaemia - viral                                  | Infection      |
| Septicaemia - fungal                                 | Infection      |
| Septicaemia - protozoa                               | Infection      |
| Septicaemia - other                                  | Infection      |
| Liver - bacterial                                    | Infection      |
| Liver - viral                                        | Infection      |
| Liver - other                                        | Infection      |
| Other site - bacterial                               | Infection      |
| Other site - viral                                   | Infection      |
| Other site - fungal                                  | Infection      |
| Other site - other                                   | Infection      |
| Gastrointestinal haemorrhage                         | Other          |

|                                           |       |
|-------------------------------------------|-------|
| Haemorrhage from dialysis access site     | Other |
| Haemorrhage from transplant artery        | Other |
| Haemorrhage from elsewhere                | Other |
| Withdrawal - psycho social reasons        | Other |
| Patient refused treatment                 | Other |
| Suicide                                   | Other |
| Therapy ceased other reasons              | Other |
| Accidental death (all causes)             | Other |
| Withdrawal - dialysis access difficulties | Other |
| Hepatic failure                           | Other |
| Uraemia Caused by Graft Failure           | Other |
| Pancreatitis                              | Other |
| Bone marrow depression                    | Other |
| Cachexia                                  | Other |
| Chronic respiratory failure               | Other |
| Perforation abdominal viscus              | Other |
| Dialysis dementia (aluminium)             | Other |
| Other                                     | Other |
| Unknown                                   | Other |

---

Table S2: Missing baseline data

| Parameter                                                        | 1980-89    | 1990-99  | 2000-09 | 2010-18 |
|------------------------------------------------------------------|------------|----------|---------|---------|
|                                                                  | n(%)       | n(%)     | n(%)    | n(%)    |
| Age at transplant                                                | 0 (0)      | 0 (0)    | 0 (0)   | 0 (0)   |
| Gender                                                           | 0 (0)      | 0 (0)    | 0 (0)   | 0 (0)   |
| Ethnicity                                                        | 0 (0)      | 1 (0)    | 1 (0)   | 220 (3) |
| Time since first RRT                                             | 0 (0)      | 0 (0)    | 0 (0)   | 0 (0)   |
| Primary renal disease                                            | 0 (0)      | 0 (0)    | 0 (0)   | 150 (2) |
| Dialysis modality prior to transplant                            | 0 (0)      | 0 (0)    | 0 (0)   | 0 (0)   |
| Diabetes as comorbidity                                          | 1,439 (36) | 231 (5)  | 4 (0)   | 53 (1)  |
| Chronic lung disease                                             | 1,793 (45) | 342 (7)  | 2 (0)   | 53 (1)  |
| CV disease                                                       | 1,723 (44) | 317 (7)  | 2 (0)   | 52 (1)  |
| Non-skin cancer diagnosis prior to transplant                    | 0 (0)      | 0 (0)    | 0 (0)   | 0 (0)   |
| Number of HLA mismatches                                         | 245 (6)    | 12 (0)   | 23 (0)  | 167 (2) |
| Donor type/ischaemia time                                        | 1,882 (48) | 100 (2)  | 48 (1)  | 275 (3) |
| CNI at transplant                                                | 108 (3)    | 0 (0)    | 2 (0)   | 42 (0)  |
| Antimetabolite at transplant                                     | 108 (3)    | 0 (0)    | 2 (0)   | 42 (0)  |
| Prednisolone at transplant                                       | 108 (3)    | 0 (0)    | 2 (0)   | 42 (0)  |
| mTOR at transplant                                               | 108 (3)    | 0 (0)    | 2 (0)   | 42 (0)  |
| Anti-CD25 Rx (basiliximab or daclizumab) and/or T-cell depletion | 0 (0)      | 0 (0)    | 0 (0)   | 0 (0)   |
| BMI at transplant                                                | 2,770 (76) | 977 (22) | 12 (0)  | 453 (6) |
| Smoking                                                          | 2,625 (66) | 771 (16) | 7 (0)   | 192 (2) |
| eGFR category 1m after transplant                                | 776 (20)   | 337 (7)  | 286 (5) | 528 (6) |

Table S3: Adjusted hazard ratio (using 2015-2018 as the reference year) for all-cause death.

| Time post-transplant | Period  | HR   | 95% confidence interval | p-value |
|----------------------|---------|------|-------------------------|---------|
| 0-<3m                | 2015-18 | 1    |                         | <0.001  |
|                      | 2010-14 | 0.94 | 0.46-1.42               |         |
|                      | 2005-09 | 0.71 | 0.32-1.10               |         |
|                      | 2000-04 | 0.38 | 0.19-0.56               |         |
|                      | 1995-99 | 0.32 | 0.16-0.49               |         |
|                      | 1990-94 | 0.28 | 0.13-0.43               |         |
|                      | 1985-89 | 0.15 | 0.08-0.23               |         |
|                      | 1980-84 | 0.15 | 0.07-0.23               |         |
| 3-<12m               | 2015-18 | 1    |                         | <0.001  |
|                      | 2010-14 | 0.75 | 0.40-1.09               |         |
|                      | 2005-09 | 0.62 | 0.31-0.93               |         |
|                      | 2000-04 | 0.43 | 0.22-0.64               |         |
|                      | 1995-99 | 0.38 | 0.19-0.58               |         |
|                      | 1990-94 | 0.28 | 0.14-0.42               |         |
|                      | 1985-89 | 0.18 | 0.09-0.26               |         |
|                      | 1980-84 | 0.14 | 0.07-0.22               |         |
| 1-<5yr               | 2015-18 | 1    |                         | <0.001  |
|                      | 2010-14 | 0.80 | 0.63-0.96               |         |
|                      | 2005-09 | 0.87 | 0.66-1.07               |         |
|                      | 2000-04 | 0.62 | 0.48-0.77               |         |
|                      | 1995-99 | 0.60 | 0.45-0.75               |         |
|                      | 1990-94 | 0.42 | 0.32-0.52               |         |
|                      | 1985-89 | 0.26 | 0.19-0.32               |         |
|                      | 1980-84 | 0.19 | 0.13-0.25               |         |
| 5-<10yr              | 2015-18 | 1    |                         | <0.001  |
|                      | 2010-14 | 0.92 | 0.75-1.08               |         |
|                      | 2005-09 | 0.81 | 0.66-0.97               |         |
|                      | 2000-04 | 0.56 | 0.45-0.67               |         |
|                      | 1995-99 | 0.44 | 0.36-0.53               |         |
|                      | 1990-94 | 0.33 | 0.26-0.40               |         |
|                      | 1985-89 | 0.31 | 0.22-0.41               |         |
|                      | 1980-84 | 0.31 | 0.22-0.41               |         |
| 10yr+                | 2015-18 | 1    |                         | <0.001  |
|                      | 2010-14 | 0.88 | 0.77-0.99               |         |
|                      | 2005-09 | 0.80 | 0.69-0.90               |         |
|                      | 2000-04 | 0.76 | 0.64-0.87               |         |
|                      | 1995-99 | 0.77 | 0.63-0.91               |         |
|                      | 1990-94 | 0.65 | 0.46-0.84               |         |

HR – hazard ratio, adjusted for age at transplantation, gender, ethnicity, time on dialysis, donor type and cause of kidney disease, stratified by time-period post-transplant

Table S4: Adjusted hazard ratio (using 2015-2018 as the reference year) for cardiovascular death

| Time post-transplant | Era     | HR   | 95% confidence interval | p-value |
|----------------------|---------|------|-------------------------|---------|
| 0-<3m                | 2015-18 | 1    |                         | <0.001  |
|                      | 2010-14 | 0.99 | 0.30-1.68               |         |
|                      | 2005-09 | 0.66 | 0.18-1.13               |         |
|                      | 2000-04 | 0.63 | 0.14-1.11               |         |
|                      | 1995-99 | 0.43 | 0.10-0.76               |         |
|                      | 1990-94 | 0.38 | 0.08-0.67               |         |
|                      | 1985-89 | 0.16 | 0.05-0.26               |         |
|                      | 1980-84 | 0.20 | 0.04-0.37               |         |
| 3-<12m               | 2015-18 | 1    |                         | <0.001  |
|                      | 2010-14 | 0.55 | 0.06-1.04               |         |
|                      | 2005-09 | 0.43 | 0.03-0.83               |         |
|                      | 2000-04 | 0.60 | 0.00-1.24               |         |
|                      | 1995-99 | 0.32 | 0.01-0.63               |         |
|                      | 1990-94 | 0.19 | 0.02-0.35               |         |
|                      | 1985-89 | 0.11 | 0.01-0.21               |         |
|                      | 1980-84 | 0.07 | 0.01-0.13               |         |
| 1-<5yr               | 2015-18 | 1    |                         | <0.001  |
|                      | 2010-14 | 0.93 | 0.56-1.29               |         |
|                      | 2005-09 | 0.65 | 0.38-0.92               |         |
|                      | 2000-04 | 0.51 | 0.29-0.72               |         |
|                      | 1995-99 | 0.32 | 0.19-0.45               |         |
|                      | 1990-94 | 0.24 | 0.14-0.34               |         |
|                      | 1985-89 | 0.13 | 0.08-0.18               |         |
|                      | 1980-84 | 0.10 | 0.05-0.15               |         |
| 5-<10yr              | 2015-18 | 1    |                         | <0.001  |
|                      | 2010-14 | 0.87 | 0.59-1.16               |         |
|                      | 2005-09 | 0.59 | 0.40-0.78               |         |
|                      | 2000-04 | 0.49 | 0.32-0.67               |         |
|                      | 1995-99 | 0.32 | 0.22-0.43               |         |
|                      | 1990-94 | 0.21 | 0.13-0.28               |         |
|                      | 1985-89 | 0.15 | 0.09-0.22               |         |
|                      | 1980-84 | 0.10 | 0.05-0.15               |         |
| 10yr+                | 2015-18 | 1    |                         | <0.001  |
|                      | 2010-14 | 0.73 | 0.56-0.90               |         |
|                      | 2005-09 | 0.53 | 0.41-0.66               |         |
|                      | 2000-04 | 0.48 | 0.36-0.60               |         |
|                      | 1995-99 | 0.43 | 0.30-0.56               |         |
|                      | 1990-94 | 0.34 | 0.19-0.49               |         |

HR – hazard ratio, adjusted for age at transplantation, gender, ethnicity, time on dialysis, donor type and cause of kidney disease, stratified by time-period post-transplant

Table S5: Adjusted hazard ratio (using 2015-2018 as the reference year) for cancer death

| Time post-transplant <sup>1</sup> | Era     | HR   | 95% confidence interval | p-value |
|-----------------------------------|---------|------|-------------------------|---------|
| 3-<12m                            | 2015-18 | 1    |                         | <0.001  |
|                                   | 2010-14 | 0.95 | 0.00-2.28               |         |
|                                   | 2005-09 | 0.37 | 0.00-0.83               |         |
|                                   | 2000-04 | 0.39 | 0.00-0.92               |         |
|                                   | 1995-99 | 0.33 | 0.00-0.78               |         |
|                                   | 1990-94 | 0.33 | 0.00-0.79               |         |
|                                   | 1985-89 | 0.25 | 0.00-0.59               |         |
|                                   | 1980-84 | 0.35 | 0.00-0.98               |         |
| 1-<5yr                            | 2015-18 | 1    |                         | <0.001  |
|                                   | 2010-14 | 0.75 | 0.48-1.01               |         |
|                                   | 2005-09 | 0.95 | 0.55-1.34               |         |
|                                   | 2000-04 | 0.65 | 0.39-0.92               |         |
|                                   | 1995-99 | 0.70 | 0.39-1.02               |         |
|                                   | 1990-94 | 0.70 | 0.37-1.03               |         |
|                                   | 1985-89 | 0.61 | 0.28-0.94               |         |
|                                   | 1980-84 | 0.69 | 0.05-1.34               |         |
| 5-<10yr                           | 2015-18 | 1    |                         | <0.001  |
|                                   | 2010-14 | 0.74 | 0.50-0.99               |         |
|                                   | 2005-09 | 0.69 | 0.45-0.93               |         |
|                                   | 2000-04 | 0.43 | 0.28-0.58               |         |
|                                   | 1995-99 | 0.40 | 0.26-0.54               |         |
|                                   | 1990-94 | 0.36 | 0.21-0.51               |         |
|                                   | 1985-89 | 0.47 | 0.16-0.78               |         |
| 10yr+                             | 2015-18 | 1    |                         | <0.001  |
|                                   | 2010-14 | 0.80 | 0.62-0.98               |         |
|                                   | 2005-09 | 0.72 | 0.54-0.89               |         |
|                                   | 2000-04 | 0.74 | 0.54-0.94               |         |
|                                   | 1995-99 | 0.92 | 0.59-1.26               |         |
|                                   | 1990-94 | 1.26 | 0.36-2.17               |         |

HR – hazard ratio, adjusted for age at transplantation, gender, ethnicity, time on dialysis, donor type and cause of kidney disease, stratified by time-period post-transplant. <sup>Note 1</sup> HRs for 0 to 3 months post-transplant are not estimable due to a lack of observations

Table S6: Adjusted hazard ratio (using 2015-2018 as the reference year) for infection-related death

| Time post-transplant | Era     | HR   | 95% confidence interval | p-value |
|----------------------|---------|------|-------------------------|---------|
| 0-<3m                | 2015-18 | 1    |                         | <0.001  |
|                      | 2010-14 | 0.58 | 0.00-1.19               |         |
|                      | 2005-09 | 0.46 | 0.00-0.97               |         |
|                      | 2000-04 | 0.15 | 0.01-0.29               |         |
|                      | 1995-99 | 0.19 | 0.00-0.40               |         |
|                      | 1990-94 | 0.16 | 0.00-0.34               |         |
|                      | 1985-89 | 0.08 | 0.00-0.16               |         |
|                      | 1980-84 | 0.08 | 0.00-0.16               |         |
| 3-<12m               | 2015-18 | 1    |                         | <0.001  |
|                      | 2010-14 | 0.66 | 0.14-1.19               |         |
|                      | 2005-09 | 0.53 | 0.08-0.98               |         |
|                      | 2000-04 | 0.23 | 0.05-0.41               |         |
|                      | 1995-99 | 0.26 | 0.04-0.47               |         |
|                      | 1990-94 | 0.20 | 0.04-0.36               |         |
|                      | 1985-89 | 0.13 | 0.02-0.24               |         |
|                      | 1980-84 | 0.15 | 0.00-0.29               |         |
| 1-<5yr               | 2015-18 | 1    |                         | <0.001  |
|                      | 2010-14 | 0.50 | 0.24-0.76               |         |
|                      | 2005-09 | 0.55 | 0.23-0.86               |         |
|                      | 2000-04 | 0.45 | 0.18-0.71               |         |
|                      | 1995-99 | 0.71 | 0.20-1.22               |         |
|                      | 1990-94 | 0.32 | 0.13-0.52               |         |
|                      | 1985-89 | 0.23 | 0.08-0.39               |         |
|                      | 1980-84 | 0.16 | 0.02-0.29               |         |
| 5-<10yr              | 2015-18 | 1    |                         | <0.001  |
|                      | 2010-14 | 0.80 | 0.40-1.20               |         |
|                      | 2005-09 | 0.63 | 0.31-0.96               |         |
|                      | 2000-04 | 0.47 | 0.22-0.72               |         |
|                      | 1995-99 | 0.36 | 0.17-0.55               |         |
|                      | 1990-94 | 0.58 | 0.16-1.01               |         |
|                      | 1985-89 | 0.40 | 0.01-0.79               |         |
|                      | 1980-84 | 0.40 | 0.01-0.79               |         |
| 10yr+                | 2015-18 | 1    |                         | <0.001  |
|                      | 2010-14 | 0.79 | 0.52-1.05               |         |
|                      | 2005-09 | 0.74 | 0.47-1.02               |         |
|                      | 2000-04 | 0.82 | 0.48-1.16               |         |
|                      | 1995-99 | 0.64 | 0.34-0.95               |         |
|                      | 1990-94 | 0.64 | 0.13-1.14               |         |

HR – hazard ratio, adjusted for age at transplantation, gender, ethnicity, time on dialysis, donor type and cause of kidney disease, stratified by time-period post-transplant



Table S7: Death after graft failure, adjusted death rates by time (<1 year or 1+years) post graft failure

| Period  | Time interval<br>post graft<br>failure | Adjusted death rates (per 100 patient-years) |       |        |                       |       |
|---------|----------------------------------------|----------------------------------------------|-------|--------|-----------------------|-------|
|         |                                        | All-cause                                    | CV    | Cancer | Infection-<br>related | Other |
| 1980-84 | 0-1yr                                  | 23.38                                        | 11.11 | 0.34   | 4.94                  | 6.77  |
|         | 1yr+                                   | 8.75                                         | 5.77  | 0.22   | 1.23                  | 1.59  |
| 1985-89 | 0-1yr                                  | 30.18                                        | 13.60 | 1.37   | 7.56                  | 7.13  |
|         | 1yr+                                   | 11.20                                        | 6.98  | 0.28   | 3.01                  | 1.11  |
| 1990-94 | 0-1yr                                  | 31.44                                        | 12.04 | 0.58   | 8.34                  | 9.95  |
|         | 1yr+                                   | 12.48                                        | 7.73  | 0.47   | 1.99                  | 2.37  |
| 1995-99 | 0-1yr                                  | 21.59                                        | 10.72 | 1.52   | 4.41                  | 5.17  |
|         | 1yr+                                   | 11.48                                        | 6.81  | 0.53   | 2.27                  | 1.92  |
| 2000-04 | 0-1yr                                  | 15.77                                        | 6.34  | 0.65   | 4.75                  | 4.19  |
|         | 1yr+                                   | 10.53                                        | 6.53  | 0.34   | 1.40                  | 2.27  |
| 2005-09 | 0-1yr                                  | 15.78                                        | 6.94  | 1.63   | 3.71                  | 3.56  |
|         | 1yr+                                   | 8.14                                         | 4.50  | 0.63   | 1.38                  | 1.62  |
| 2010-14 | 0-1yr                                  | 11.19                                        | 4.85  | 0.65   | 2.78                  | 2.99  |
|         | 1yr+                                   | 6.61                                         | 3.55  | 0.49   | 0.92                  | 1.67  |
| 2015-18 | 0-1yr                                  | 12.06                                        | 3.69  | 0.91   | 2.53                  | 4.91  |
|         | 1yr+                                   | 7.96                                         | 3.51  | 0.69   | 1.07                  | 2.73  |

Table S8. Causes of “other” deaths after first graft failure.

| Causes of death – other deaths          | Timing of death post graft failure |            |            |
|-----------------------------------------|------------------------------------|------------|------------|
|                                         | <1 year                            | 1 year +   | Total      |
| Gastrointestinal haemorrhage            | 6                                  | 15         | 21         |
| Haemorrhage from dialysis access site   | 2                                  | 4          | 6          |
| Haemorrhage from transplant artery      | 7                                  | 0          | 7          |
| Haemorrhage from elsewhere              | 12                                 | 13         | 25         |
| Withdrawal-psycho social reasons        | 38                                 | 82         | 120        |
| Patient refused treatment               | 23                                 | 52         | 75         |
| Suicide                                 | 4                                  | 1          | 5          |
| Therapy ceased other reasons            | 31                                 | 49         | 80         |
| Accidental death (all causes)           | 3                                  | 13         | 16         |
| Withdrawal-dialysis access difficulties | 5                                  | 12         | 17         |
| Hepatic failure (specify)               | 7                                  | 7          | 14         |
| Uraemia caused by graft failure         | 16                                 | 0          | 16         |
| Pancreatitis                            | 14                                 | 1          | 15         |
| Bone marrow depression                  | 1                                  | 0          | 1          |
| Cachexia                                | 7                                  | 11         | 18         |
| Unknown                                 | 29                                 | 49         | 78         |
| Perforation abdominal viscus            | 9                                  | 5          | 14         |
| Dialysis dementia (aluminium)           | 1                                  | 2          | 3          |
| Other                                   | 31                                 | 46         | 77         |
| <b>Total</b>                            | <b>246</b>                         | <b>362</b> | <b>608</b> |

Figure S1: Sensitivity analysis for death after transplantation. Adjusted all-cause death rate by time periods post-transplant (per 100 patient-years), censored at retransplant and date of last follow-up.

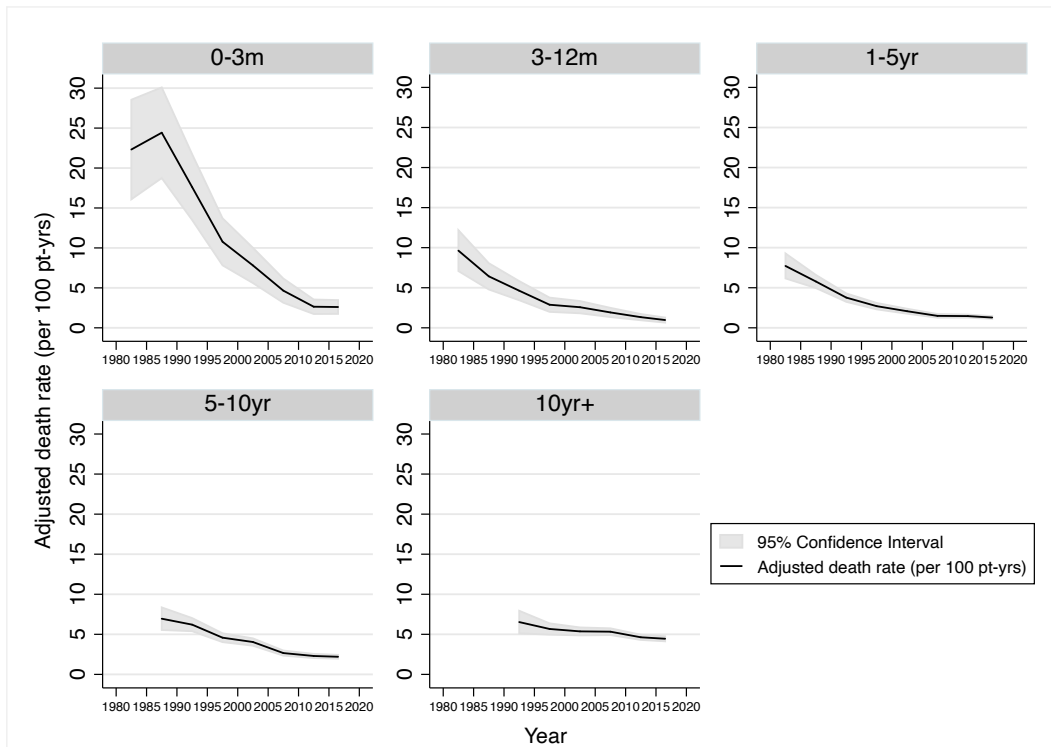

Rates adjusted for: age at transplant, gender ethnicity, duration of dialysis, donor-type, cause of kidney disease and stratified by time period post-transplant

Figure S2: Sensitivity analysis for death after transplantation. Adjusted cause-specific death rates by time periods post-transplant (per 100 patient-years), censored at retransplant and date of last follow-up

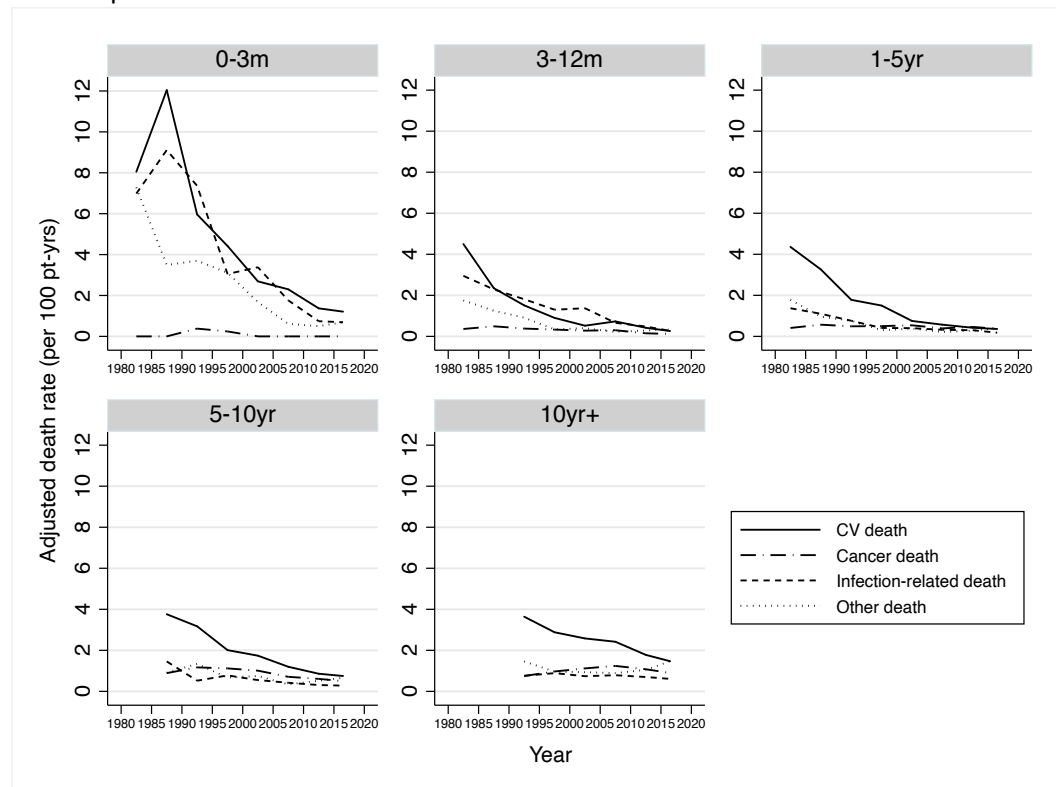

Rates adjusted for: age at transplant, gender ethnicity, duration of dialysis, donor-type, cause of kidney disease and stratified by time period post-transplant
